# Supplementary material for: Phosphorylation of LKB1 by PDK1 Inhibits Cell Proliferation and Organ Growth by Decreased Activation of AMPK
Source: MDPI journal article supplement (doi:10.3390/cells12050812), 2023-03-06
Supplement: s1 [file s1]

**Supplementary Figure S1. RMSD of the tested LKB1 proteins.**

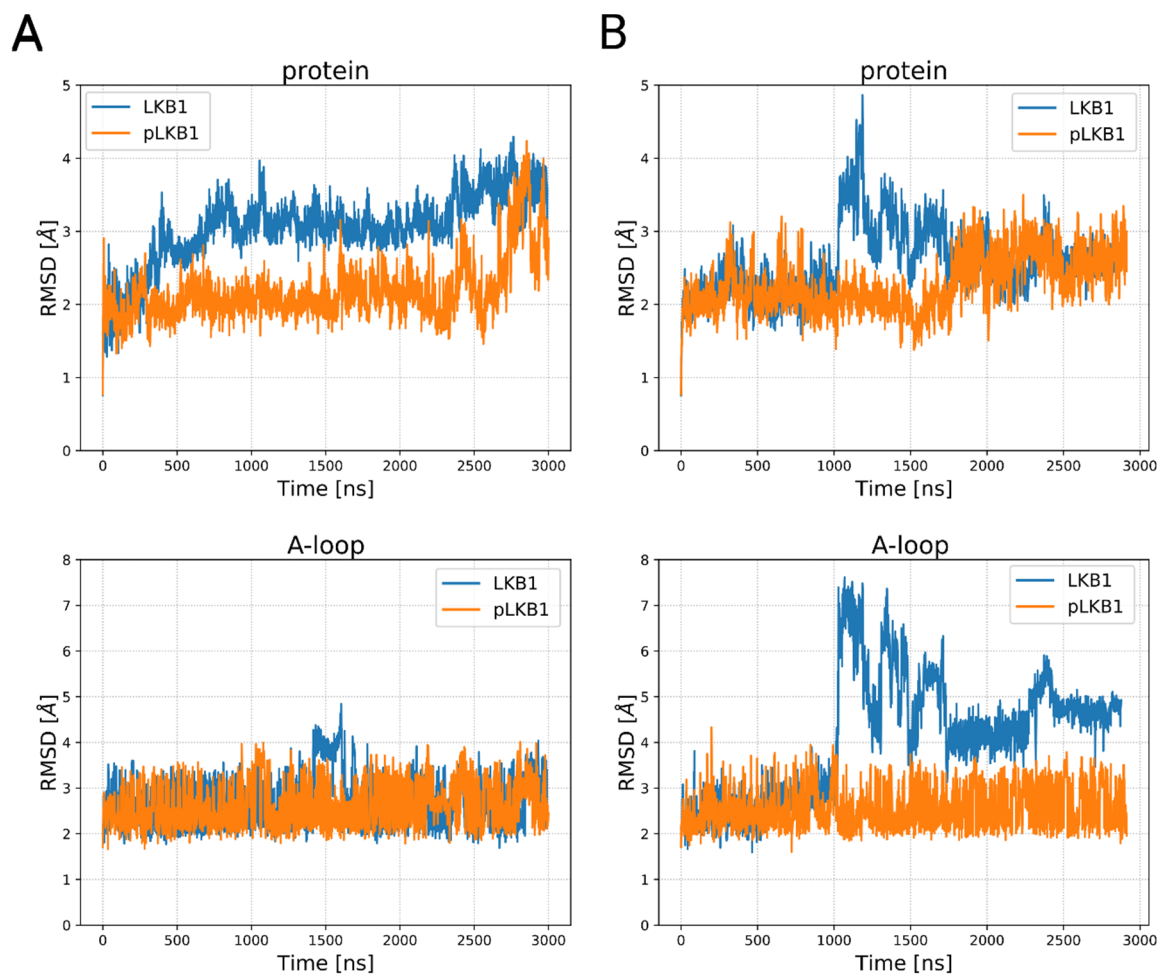

The RMSD of the protein (upper panel) and the A-loop region (lower panel) is shown for the first sample (A) and the second sample (B).

**Supplementary Figure S2. Distances between pairs of residues in the binding pocket.**

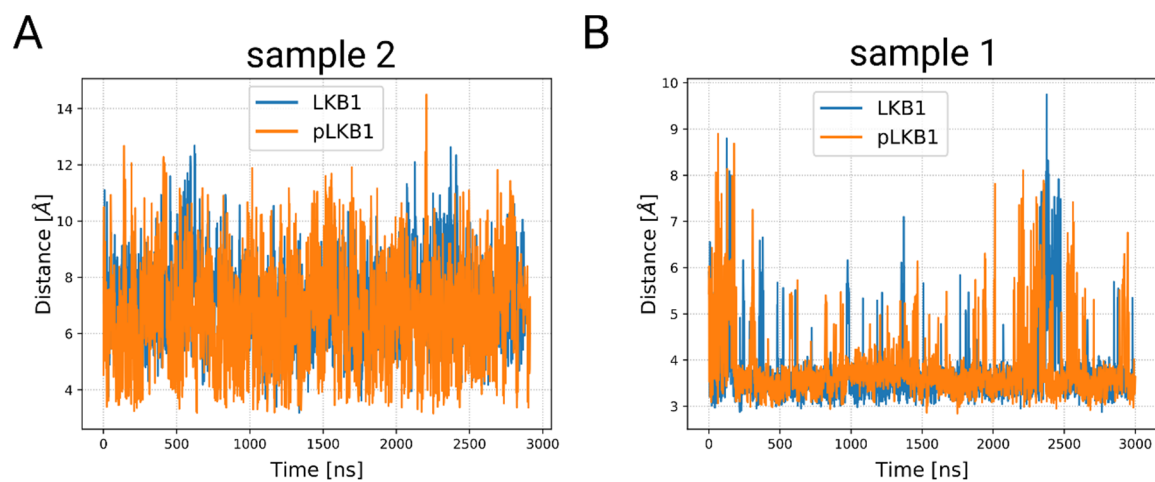

(A) The distance between S60 and A194 residues in the second sample and (B) the distance between K78 and E98 residues in the first sample is represented.
